# Supplementary material
Source: Royal Society of Chemistry journal article supplement (doi:10.1039/d5dd00383k)
Supplement: d5dd00383k1.pdf [file d5dd00383k1.pdf]

## Supplementary materials to

### GEOMIND: A hybrid generative artificial intelligence for geopolymer design and optimization

Sébastien Rousseau<sup>1,2</sup>, Assil Bouzid<sup>1</sup>, Sylvie Rossignol<sup>1</sup> and Ameni Gharzouni\*<sup>1</sup>

<sup>1</sup> Institut de Recherche sur les Céramiques, UMR 7315 CNRS - Université de Limoges, Centre Européen de la Céramique, 12 rue Atlantis, 87068, Limoges Cedex, France.

<sup>2</sup> XLIM, UMR CNRS 7252, 16 Rue Jules Vallès, 19100 Brive La Gaillarde, France

\*Corresponding author: ameni.gharzouni@unilim.fr

Table S1. Simulator hyperparameters

| Hidden Layers                | Units                 | Activation                               |     |
|------------------------------|-----------------------|------------------------------------------|-----|
| Dense                        | 128                   | Parametric Rectified Linear Unit (PReLU) |     |
| Dense                        | 128                   | PReLU                                    |     |
| Dense                        | 64                    | PReLU                                    |     |
| Dense                        | 64                    | PReLU                                    |     |
| Dense (mean)                 | 32 (latent dimension) | Linear                                   |     |
| Dense (log variance)         | 32 (latent dimension) | Linear                                   |     |
| Dense                        | 64                    | PReLU                                    |     |
| Dense                        | 64                    | PReLU                                    |     |
| Dense                        | 128                   | Rectified Linear Unit (ReLU)             |     |
| Dense                        | 128                   | ReLU                                     |     |
| Output Layers                |                       |                                          |     |
| Dense (viscosity)            | 3                     | Linear                                   | MAE |
| Dense (mixture density)      | 1                     | Linear                                   | MAE |
| Dense (compressive strength) | 1                     | Linear                                   | MAE |
| Dense (material density)     | 1                     | Linear                                   | MAE |

| Optimizer | Learning rate | Epochs | Batch size |
|-----------|---------------|--------|------------|
| RMSprop   | 0.0005        | 250    | 16         |

Table S2. Formulator hyperparameters

| <b>Hidden Layers</b>  | <b>Units</b>          | <b>Activation</b> |     |                      |
|-----------------------|-----------------------|-------------------|-----|----------------------|
| Dense                 | 128                   | PReLU             |     |                      |
| Dense                 | 128                   | PReLU             |     |                      |
| Dense                 | 64                    | PReLU             |     |                      |
| Dense                 | 64                    | PReLU             |     |                      |
| Dense (mean)          | 32 (latent dimension) | Linear            |     |                      |
| Dense (log variance)  | 32 (latent dimension) | Linear            |     |                      |
| Dense                 | 64                    | PReLU             |     |                      |
| Dense                 | 64                    | PReLU             |     |                      |
| Dense                 | 128                   | ReLU)             |     |                      |
| Dense                 | 128                   | ReLU              |     |                      |
| <b>Output Layers</b>  |                       |                   |     | <b>Loss function</b> |
| Dense (precursors)    | 11                    | Sigmoid           |     | MAE                  |
| Lambda (sums)         | 1                     |                   | MAE |                      |
| Lambda (Si/M)         | 1                     |                   | MAE |                      |
| Lambda (Si/Al)        | 1                     |                   | MAE |                      |
| Lambda (solid/liquid) | 1                     |                   | MAE |                      |

| <b>Optimizer</b> | <b>Learning rate</b> | <b>Epochs</b> | <b>Batch size</b> |
|------------------|----------------------|---------------|-------------------|
| RMSprop          | 0.0005               | 310           | 16                |

Table S3. Final loss values of Formulator model training methods

| Formulator model loss | Training | Validation |
|-----------------------|----------|------------|
| MAE with GEOMIND      | 0.092    | 0.094      |
| MAE without GEOMIND   | 0.118    | 0.123      |

Table S4. Final loss values of different models of Formulator in GEOMIND framework

| Model           | Training MAE on precursors | Validation MAE on precursors | Training MAE on properties | Validation MAE on properties |
|-----------------|----------------------------|------------------------------|----------------------------|------------------------------|
| MLP             | 0.087                      | 0.096                        | 0.275                      | 0.261                        |
| Gaussian VAE    | 0.092                      | 0.094                        | 0.282                      | 0.249                        |
| Student's t VAE | 0.091                      | 0.098                        | 0.284                      | 0.291                        |

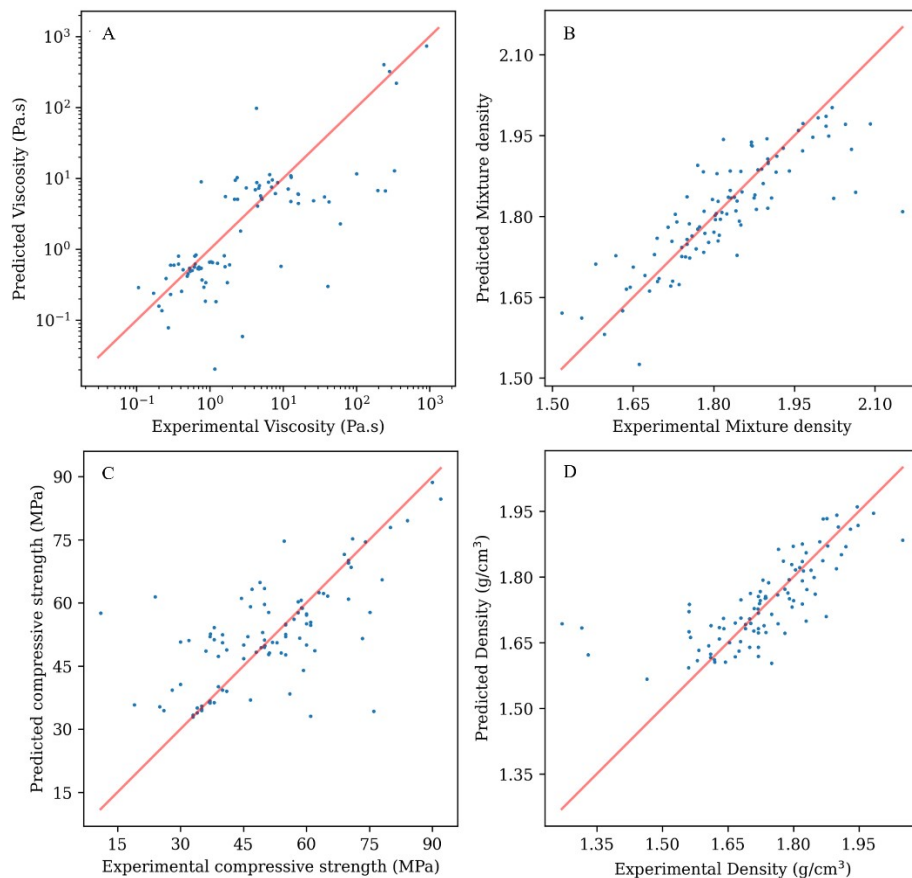

Figure S1. Predicted vs. experimental results for 98 samples

Table S5. Target, predicted and experimental properties of the fifteen test samples

| Sample | Properties   | Initial viscosity (Pa.s) | Mixture density (g/cm <sup>3</sup> ) | Compressive strength (MPa) | Material density (g/cm <sup>3</sup> ) |
|--------|--------------|--------------------------|--------------------------------------|----------------------------|---------------------------------------|
| 1      | target       | 1.62                     | 1.56                                 | 82                         | 1.60                                  |
|        | predicted    | 0.75                     | 1.70                                 | 51                         | 1.76                                  |
|        | experimental | 1.44                     | 1.79                                 | 57                         | 1.80                                  |
| 2      | target       | 79.62                    | 1.55                                 | 32                         | 1.72                                  |
|        | predicted    | 4.95                     | 1.75                                 | 54                         | 1.77                                  |
|        | experimental | 9.78                     | 1.79                                 | 56                         | 1.84                                  |
| 3      | target       | 14.15                    | 1.91                                 | 45                         | 1.98                                  |
|        | predicted    | 7.18                     | 1.77                                 | 58                         | 1.83                                  |
|        | experimental | 109.2                    | 1.82                                 | 75                         | 1.83                                  |
| 4      | target       | 0.50                     | 1.69                                 | 64                         | 1.5                                   |
|        | predicted    | 0.54                     | 1.78                                 | 46                         | 1.69                                  |
|        | experimental | 0.73                     | 1.74                                 | 58                         | 1.72                                  |
| 5      | target       | 2.11                     | 1.64                                 | 50                         | 1.55                                  |
|        | predicted    | 5.42                     | 1.71                                 | 44                         | 1,66                                  |
|        | experimental | 7.08                     | 1.66                                 | 52                         | 1,69                                  |
| 6      | target       | 4.00                     | 1.31                                 | 45                         | 1.50                                  |
|        | predicted    | 9.05                     | 1.73                                 | 48                         | 1.66                                  |
|        | experimental | 13.36                    | 1.65                                 | 47                         | 1.70                                  |
| 7      | target       | 6.00                     | 1.85                                 | 62                         | 1.83                                  |
|        | predicted    | 8.55                     | 1.78                                 | 53                         | 1.77                                  |
|        | experimental | 12.80                    | 1.80                                 | 52                         | 1.79                                  |
| 8      | target       | 2.00                     | 1.65                                 | 30                         | 1.69                                  |
|        | predicted    | 0.29                     | 1.68                                 | 47                         | 1.61                                  |
|        | experimental | 1.45                     | 1.60                                 | 33                         | 1.60                                  |
| 9      | target       | 1.00                     | 1.31                                 | 41                         | 1.80                                  |
|        | predicted    | 0.34                     | 1.73                                 | 32                         | 1.60                                  |
|        | experimental | 0.10                     | 1.65                                 | 27                         | 1.59                                  |
| 10     | target       | 2.40                     | 1.90                                 | 80                         | 2.00                                  |
|        | predicted    | 8.28                     | 1.88                                 | 53                         | 1.79                                  |
|        | experimental | 10.94                    | 1.80                                 | 60                         | 1.79                                  |
| 11     | target       | 0.30                     | 1.60                                 | 38                         | 1.90                                  |
|        | predicted    | 0.41                     | 1.71                                 | 35                         | 1.61                                  |
|        | experimental | 0.23                     | 1.64                                 | 39                         | 1.61                                  |
| 12     | target       | 1.20                     | 1.10                                 | 25                         | 1.50                                  |
|        | predicted    | 0.07                     | 1.54                                 | 29                         | 1.60                                  |
|        | experimental | 0.02                     | 1.51                                 | 14                         | 1.55                                  |
| 13     | target       | 1.70                     | 1.43                                 | 41                         | 1.65                                  |
|        | predicted    | 0.27                     | 1.66                                 | 34                         | 1.60                                  |
|        | experimental | 0.12                     | 1.63                                 | 34                         | 1.55                                  |
| 14     | target       | 0.19                     | 2.10                                 | 70                         | 2.30                                  |
|        | predicted    | 7.76                     | 1.86                                 | 56                         | 1.76                                  |
|        | experimental | 12.00                    | 1.82                                 | 76                         | 1.76                                  |
| 15     | target       | 0.13                     | 1.90                                 | 32                         | 1.60                                  |
|        | predicted    | 0.58                     | 1.74                                 | 45                         | 1.67                                  |
|        | experimental | 0.48                     | 1.74                                 | 42                         | 1.63                                  |

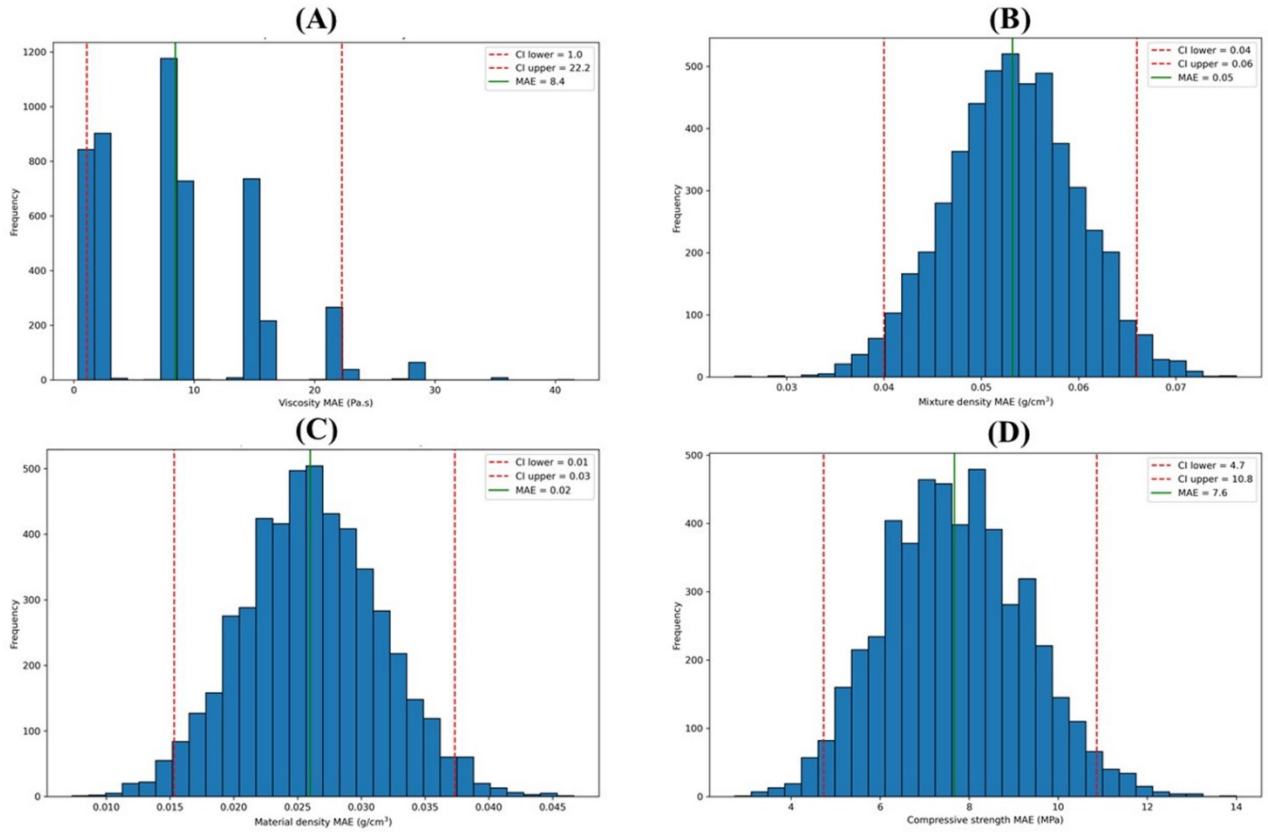

Figure S2. Bootstrap distribution of (A) initial viscosity, (B) mixture density, (C) compressive strength and (D) material density mean absolute errors. MAE (solid green line), CI lower (dashed red line) and upper (dashed red line) are also provided

Table S6. Target, predicted and experimental properties of the five feasible test samples proposed by GEOMIND without the feasibility controller block

| Sample | Properties   | Initial viscosity (Pa.s) | Compressive strength (MPa) | Material density (g/cm <sup>3</sup> ) |
|--------|--------------|--------------------------|----------------------------|---------------------------------------|
| 1      | target       | 1.20                     | 70                         | 1.55                                  |
|        | predicted    | 3.99                     | 63                         | 1.71                                  |
|        | experimental | 40.86                    | 50                         | 1.82                                  |
| 2      | target       | 1.30                     | 67                         | 1.37                                  |
|        | predicted    | 4.69                     | 47                         | 1.61                                  |
|        | experimental | 1,85                     | 50                         | 1.75                                  |
| 3      | target       | 79.00                    | 51                         | 1.20                                  |
|        | predicted    | 1.03                     | 33                         | 1.37                                  |
|        | experimental | 2.78                     | 39                         | 1.56                                  |
| 4      | target       | 0.50                     | 85                         | 1.60                                  |
|        | predicted    | 2.73                     | 41                         | 1.69                                  |
|        | experimental | 0.99                     | 53                         | 1.82                                  |
| 5      | target       | 0.80                     | 75                         | 1.30                                  |

|  |              |      |    |      |
|--|--------------|------|----|------|
|  | predicted    | 5.00 | 56 | 1.76 |
|  | experimental | 1.03 | 30 | 1.72 |

### *Bayesian optimization method*

An alternative way to achieve materials design through formulation prediction can be achieved by resorting to Bayesian optimization on top of the Simulator model in a way to search for the combination of precursor mixtures to achieve a given target property. As a grid-based search is inefficient and computationally expensive, the Bayesian offers a cost-efficient way to approach the solution in a straightforward manner. In practice, one uses the precursors mass ratios as the variables to be optimized (the formulation to be obtained) and the MAE between target and predicted properties by the simulator model as the cost to be minimized. The working principle of this scheme is illustrated in Figure S3. The main advantage of this method, in comparison with GEOMIND, is the use of a single VAE model, while the main disadvantage is that it cannot process a batch of target properties in a single run. As such, identification epochs are dedicated to a single set of target properties at once.

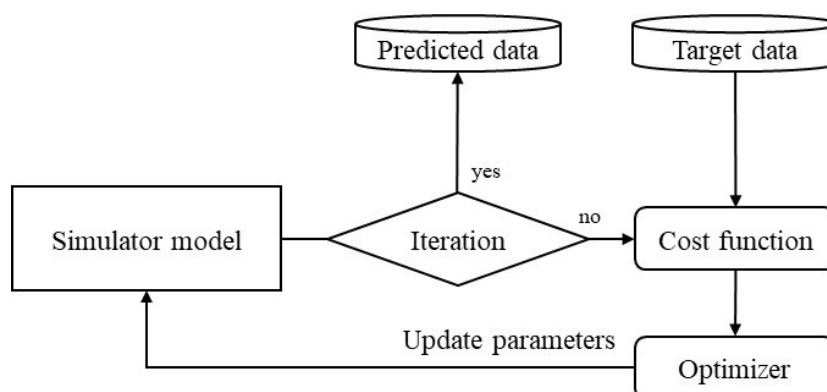

**Figure S3.** Bayesian optimization of material precursors

Compared to GEOMIND, the Bayesian Optimization method leads to larger errors on the final materials properties (Table S7). Three use-cases are represented on database properties heatmap in Figure S4. Considering sample 1, that obeys a user request of obtaining a final lightweight, viscous and resistant material, we find that while it is located in the bottom left part of the map, it's dark color that reflects a high compressive strength, does not fit with the color of the surroundings. This reflects a non-consistent user request. After prediction of the corresponding formulation, it is passed to the simulator to cross-check its actual predicted properties.

**Table S7.** MAE and nMAE between experimental and predicted with Bayesian optimization method

| Property                              | Experimental vs. target properties |          | Experimental vs. predicted properties |          |
|---------------------------------------|------------------------------------|----------|---------------------------------------|----------|
|                                       | MAE                                | nMAE (%) | MAE                                   | nMAE (%) |
| Initial viscosity (Pa·s)              | 102                                | 7.7      | 150                                   | 11.4     |
| Mixture density(g/cm <sup>3</sup> )   | 0.26                               | 39       | 0.112                                 | 17       |
| Compressive strength (MPa)            | 18                                 | 22       | 5.7                                   | 7        |
| Material density (g/cm <sup>3</sup> ) | 0.156                              | 20       | 0.088                                 | 11       |

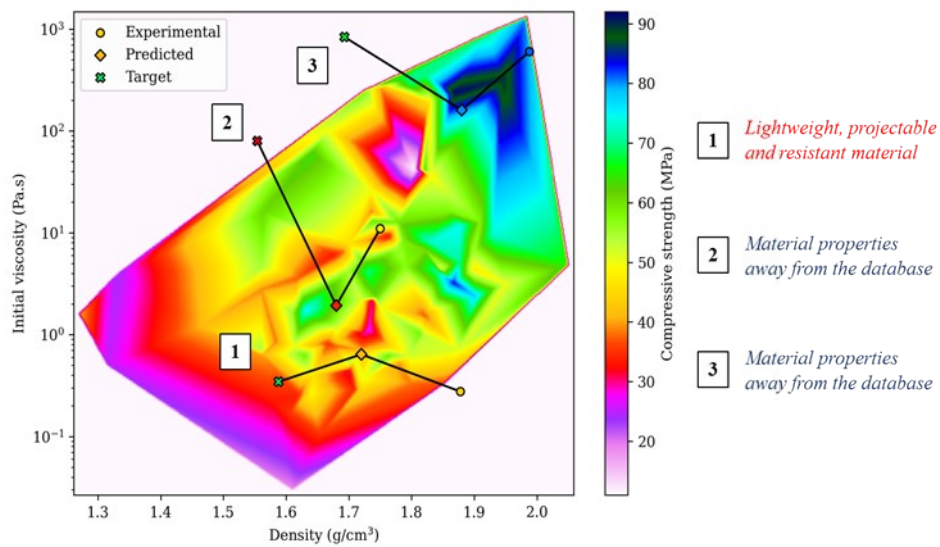

**Figure S4.** Three use-cases of Bayesian Optimization method samples represented on database properties heatmap
